# Supplementary material for: Tracking receptor motions at the plasma membrane reveals distinct effects of ligands on CCR5 dynamics depending on its dimerization status
Source: eLife. 2022 Jul 22;11:e76281. doi: 10.7554/eLife.76281 (PMC9307273; doi:10.7554/eLife.76281)
Supplement: Figure 1—figure supplement 1—source data 1. [file elife-76281-fig1-figsupp1-data1.xlsx]

## Sheet: Figure 1 supplement source data
Figure 1-figure supplement source data
Figure 1-figure supplement 1A
Matlab simulation
Figure 1-figure supplement 1B: Relative accuracy of statistical classification for decreasing signal-to-noise ratio (SNR) in synthetic time-lapse sequences
The accuracy is computed relatively to the accuracy obtained with simulated trajectories (positions) without the additional steps of generating synthetic sequences (with noise), detecting and tracking spots.
SNR	nb tracks	% confined	standard error
	1000	0.461	0.015771
10	978	0.451481	0.015921
8	975	0.446721	0.01593
6	984	0.44264	0.015834
4	978	0.362615	0.015365
2	893	0.260626	0.014682
Figure 1-figure supplement 1C: Relative accuracy of statistical classification for increasing spots’ density
The proportion of confined trajectories was set to 10% (90% Brownian), 50% (50% Brownian) and 100% (0% Brownian)
density	0.39		1.6		6.3
SNR 10 10%	0.0733262	0.00850668	0.0556213	0.00788434	0.0546282	0.00886598
GT	0.073	0.00823035	0.074	0.00828206	0.072	0.0081782
ratio	1.00447	0.11653	0.751639	0.106545	0.758725	0.123139
SNR 10 50%	0.244792	0.0138842	0.209249	0.0138467	0.17147	0.0143077
GT	0.272	0.0140789	0.253	0.0137543	0.256	0.0138078
ratio	0.899969	0.051045	0.827069	0.0547299	0.669804	0.0558893
SNR 10 100%	0.445369	0.0160659	0.436526	0.0165687	0.331476	0.0175558
GT	0.5	0.0158193	0.502	0.0158192	0.506	0.0158183
ratio	0.890739	0.0321318	0.869573	0.0330053	0.655092	0.0346953
