# Supplementary material for: Tracking receptor motions at the plasma membrane reveals distinct effects of ligands on CCR5 dynamics depending on its dimerization status
Source: eLife. 2022 Jul 22;11:e76281. doi: 10.7554/eLife.76281 (PMC9307273; doi:10.7554/eLife.76281)
Supplement: Figure 2—figure supplement 1—source data 1. [file elife-76281-fig2-figsupp1-data1.xlsx]

## Sheet: Figure 2 supplement source data
Figure 2-figure Supplement source data
Figure 2-figure supplement 1A: FLAG-ST-CCR5 tracklets motions in the basal state
Distribution of the pooled tracklets motion: restricted, Brownian, or directed motion.
Restricted	39.29	53.65	47.59	32.45	35.28	52.71	48.08	47.51	59.82	58.8	52.59	60.45	68.53	67.75	66.8	40.76	42.4	54.23	58.05	48.23	62.66	62.94	57.7	62.04
Brownian	59.92	43.9	52.09	66.37	63.51	45.45	50.58	52.21	38.12	40.14	46.72	39	31.15	31.15	30.94	58.62	56.93	44.45	41.1	50.75	36.79	35.81	42.01	37.73
Directed	0.77	2.43	0.29	1.17	1.19	1.81	1.31	0.26	2.05	1.05	0.67	0.53	0.3	1.08	2.24	0.6	0.66	1.3	1	0.53	1.24	0.28	0.2
Figure 2-figure supplement 1B: FLAG-ST-CCR5 tracklets changes along tracks in the basal state
Distribution of tracklets motion changes: all restricted, all Brownian, or fluctuated motion
All restricted	41.27	26.66	29.41	17.94	9.54	25	14.1	23.33	21.27	24.58	27.63	26.79	27.26	37.69	15.62	18.9	32.12	24.81	23.95	20.7	24.01	24.8	26.4	35.85
All Brownian	30.95	26.66	30.39	57.26	61.48	50	49.07	48.33	29.78	36.47	48.74	34.02	26.51	33.07	29.68	43.9	35.29	36.09	44.79	52.5	45.25	34.88	45.5	38.62
Fluctuated	27.78	46.68	40.2	24.8	28.98	25	36.83	28.34	48.95	38.95	23.63	39.19	46.23	29.24	54.7	37.2	32.59	39.1	31.26	26.8	30.74	40.32	28.1	25.53
