# Supplementary material for: Tracking receptor motions at the plasma membrane reveals distinct effects of ligands on CCR5 dynamics depending on its dimerization status
Source: eLife. 2022 Jul 22;11:e76281. doi: 10.7554/eLife.76281 (PMC9307273; doi:10.7554/eLife.76281)
Supplement: Figure 2—source data 1. [file elife-76281-fig2-data1.xlsx]

## Sheet: Figure 2_Source data
Figure 2 source data: eGFP-CCR5 motion in the basal state
Figure 2A: eGFP-CCR5 tracklets motions in the basal state
Single particle of eGFP-CCR5 was detected using TIRF microscopy and analyzed with the statistical method.
Distribution of the pooled tracklets motion: restricted, Brownian, or directed motion.
Restricted																				Brownian																				Directed
17.8485	14.1421	21.9319	15.2983	17.1236	13.8404	13.8	17.2185	18.435	22.0373	15.87	21.524	17.0213	23.9403	22.5171	21.875	20.5592	15.8068	14.3851		81.6691	85.6425	77.5139	84.0897	82.286	85.7855	85.5	82.7815	81.0345	77.4967	82.696	77.8822	82.1513	75.6672	76.8764	77.5735	79.2763	83.7541	85.1508		0.482393	0.215363	0.554236	0.611933	0.590468	0.374065	0.7	0	0.530504	0.466045
Figure 2B: eGFP-CCR5 tracklets changes along tracks in the basal state
Distribution of tracklets motion changes: all restricted, all Brownian, or fluctuated motion
All restricted	0	4.34783	1.47059	5.40541	0	7.04225	4.13626	5.38461	2.38095	4.67033	2.25081	5.22876	3.38164	8.42105	6.6313	3.71287	3.89105	4.62185	4.69209	3.69515	2.94118	3.10262	2.72727	4.46928	2.74914	4.91803	3.61446	1.42857	3.75	3.92157	3.7594	7.09677	5.05618	1.45985	0	0.961538	2.40964	2.8436	4	2.66666	1.33333	2.15054	3.53983	2.10526	2.04082
All Brownian	56.4103	39.1304	51.4706	56.7568	48.5714	57.7465	46.472	46.9231	50	43.1319	55.9486	37.9085	48.3092	38.4211	45.3581	53.4653	54.0856	44.1176	51.9062	50.1155	54.7059	58.4726	54.5455	57.2626	56.3574	55.7377	55.1205	54.2857	47.5	48.0392	45.1128	44.5161	42.6966	53.2847	51.8519	57.6923	59.6386	45.4976	46.9091	55.1111	62	67.7419	63.7168	65.2632	57.1429
Fluctuated	43.5897	56.5218	47.0588	37.8378	51.4286	35.2112	49.1484	47.6923	47.1429	51.9231	41.8006	56.8627	47.8261	53.1579	48.0106	42.5743	42.0234	51.2606	43.1085	45.9584	42.3529	38.4248	42.7272	37.9888	40.8935	39.3443	41.265	44.2857	48.125	48.0392	51.1278	48.3871	52.2472	45.2555	48.1481	40.3846	37.9518	51.6588	49.0909	42.2222	36.6667	30.1076	32.7434	32.6315	40.8163
[truncated: 9 more columns]
