# Supplementary material for: Tracking receptor motions at the plasma membrane reveals distinct effects of ligands on CCR5 dynamics depending on its dimerization status
Source: eLife. 2022 Jul 22;11:e76281. doi: 10.7554/eLife.76281 (PMC9307273; doi:10.7554/eLife.76281)
Supplement: Figure 3—figure supplement 1—source data 1. [file elife-76281-fig3-figsupp1-data1.xlsx]

## Sheet: Figure 3 supplement source data
Figure 3-figure Supplement source data
Figure 3-figure supplement 1- left: Effect of CCL4 on eGFP-CCR5 mobility
Percentage of restricted tracklets after CCL4 treatment over time.
	min	Medium				CCL4
	0	17.15				17
	0.5					12.6226
	1	14.4665				12.6226
	2					13.1707	14.9635	19.0226
	3	11.9664					13.2075
	4	19.7333					11.2832
	5	12.1007
	6						14.5833
	7						13.6874
	8					16.859	13.4573	23.4005
	9	14.6853				17.5099	20.3942		23.5772
	10
	11
	12					22.3899			22.0551
	13
	14	14.7679				30.0216
	15
	16					26.1959
Figure 3-figure supplement 1- right: Effect of CCL4 on eGFP-CCR5 mobility after 12 to 16 min of treatment.
Percentage of restricted tracklets after CCL4 treatment.
Untreated	CCL4
17.2185	22.3899
18.435	30.0216
22.0373	26.1959
15.87
21.524
17.0213
Figure 3-figure supplement 2: Impact of ligands on FLAG-ST-CCR5 mobility after 10 min of treatment.
Distribution of FLAG-ST-CCR5 tracklets motion after 10 min of treatment with agonists (PSC-RANTES, CCL4) or inverse agonist (MVC).
	Restricted																									Brownian
Untreated	39.29	53.65	47.59	32.45	35.28	52.71	19.02	48.08	47.51	59.82	58.8	52.59	60.45	68.53	67.75	66.8	40.76	42.4	54.23	58.05	48.23	62.66	62.94	57.7	62.04	59.92	43.9	52.09	66.37	63.51	45.45	81.18	50.58	52.21	38.12	40.14	46.72	39	31.15	31.15	30.94	58.62	56.93	44.45	41.1	50.75	36.79	35.81	42.01
CCL4	42.85	75.12	62.72	72.45	57.85	66.25	80.03	59.15	74.12	40.82	69.97	68.77														56.63	24.05	35.8	26.95	41.49	33.18	18.97	40.15	24.12	58.57	29.11	30.84
PSC-R	85.35	75.96	80.14	77	73.01	50.99	80.18	67.23	74.78	79.97	84.25	74.09	58.39	71.32	75.54	86.38										12.55	22.85	18.07	22.37	25.05	48.65	18.23	31.4	24.46	18.86	14.94	23.36	40.1	27.64	22.06	12.43
MVC	61.31	40.91	44.29	37.2	44.25	33.41	37.74	42.16	30.17	44.82	30	32	48.91	52.26	43.38	54.48	40.67	46.12	55.82	46.9	51.63	60.44				36.95	57.84	55.14	61.77	55.73	65.79	61.95	57.24	69.39	54.56	67.5	67.13	49.39	46.85	54.99	44.34	58.56	53.06	43.15	51.76	47.51	38.55
[truncated: 25 more columns]
