# Supplementary material for: Tracking receptor motions at the plasma membrane reveals distinct effects of ligands on CCR5 dynamics depending on its dimerization status
Source: eLife. 2022 Jul 22;11:e76281. doi: 10.7554/eLife.76281 (PMC9307273; doi:10.7554/eLife.76281)
Supplement: Figure 3—source data 1. [file elife-76281-fig3-data1.xlsx]

## Sheet: Figure 3_Source data
Figure 3 source data: Effect of ligands on eGFP-CCR5 mobility
Figure 3A: Impact of ligands on eGFP-CCR5 mobility
Percentage of restricted tracklets after treatment with a saturating concentration of agonists (PSC-RANTES, CCL4), or inverse agonist (MVC) over time.
min	PSC-RANTES										CCL4										MVC
0	17										17										17
0.5								18.9415			12.6226
1		16.4767				22.8777	19.6751	30.3725		26.0761	12.6226										12.3077	22.3529
2		24.153	22.3656				29.1322	41.0336	18.7731	37.721	13.1707	14.9635	19.0226									17.1474	13.1627
3		29.4855			48.4488		27.907	38.5231		33.6005		13.2075										17.8281	13.0102
4			37.3973		50.7347	45.7576	58.4084	23.0337	20.0532	30.2151		11.2832
5							54.4576	40.0355	21.6903													16.2304	15.4943
6						48.0881		41.4006				14.5833									12.8486	22.8363
7	51.0582	30.5924	57.9817				63.9485	41.7212				13.6874
8											16.859	13.4573	23.4005								8.49754
9	65.5844	27.3902		36.2393		65.8402					17.5099	20.3942		23.5772							11.2407	13.6364
10		44.722		33.9646					46.25												10.6486	12.5995
11	74.7562					49.2181																17.1464
12											22.3899			22.0551							11.7061
Figure 3B: Impact of ligands on eGFP-CCR5 mobility after 10 min of treatment.
Distribution of eGFP-CCR5 tracklets motion after 10 min of treatment with agonists (PSC-RANTES, CCL4) or inverse agonist (MVC).
	Restricted																																			Brownian
Untreated	17.2185	18.435	22.0373	15.87	21.524	17.0213	17.8485	14.1421	21.9319	15.2983	17.1236	13.8404	13.8	17.9144	22.6396	13.961	25.1786	14.931	13.7999	11.3208	15.1535	12.5793	22.6449	20.9767	20.4724	21.192	20.2393	14.178	15.4034	12.8834	13.8305	16.3314	17.5532	12.1998	11.3343	82.7815	81.0345	77.4967	82.696	77.8822	82.1513	81.6691	85.6425	77.5139	84.0897	82.286	85.7855	85.5	81.4617
CCL4	16.859	17.5099	22.3899	23.5772	22.0551	13.6874	13.4573	20.3942	15.9854	26.6085	23.4005	15.7293																								82.8205	81.6941	77.1698	74.7968	77.4436	85.8018	86.2144	79.3025	83.7096	72.9553	75.8107	83.6034
PSC-R	51.0582	65.5844	74.7562	23.1546	46.25	36.2393	33.9646	32.7907	27.3902	44.722	65.8402	49.2181																								48.1482	33.961	25.0271	76.3791	53.5417	63.3333	65.9091	66.5116	72.0069	55	34.1598	50.4527
MVC	14.6825	14.4927	8.49754	11.2407	10.6486	11.7061	13.6364	12.5995	17.1464																											85.3175	82.6087	90.6404	88.2821	88.9132	87.9203	85.4067	86.87	82.2278
Figure 3C: Impact of ligands on eGFP-CCR5 stability along tracks
Distribution of eGFP-CCR5 tracklets motion changes along tracks after 10 min of treatment with agonists (PSC-RANTES, CCL4) or inverse agonist (MVC).
	all Restricted																																													all Brownian
Untreated	0	4.34783	1.47059	5.40541	0	7.04225	4.13626	5.38461	2.38095	4.67033	2.25081	5.22876	3.38164	8.42105	6.6313	3.71287	3.89105	4.62185	4.69209	3.69515	2.94118	3.10262	2.72727	4.46928	2.74914	4.91803	3.61446	1.42857	3.75	3.92157	3.7594	7.09677	5.05618	1.45985	0	0.961538	2.40964	2.8436	4	2.66666	1.33333	2.15054	3.53983	2.10526	2.04082	56.4103	39.1304	51.4706	56.7568
CCL4	8.33333	1.35135	2.75229	3.83275	4.45545	7.36842	2.94118	5.85586	1.90476																																					56.25	54.0541	56.5749	58.1882
PSC-R	14.2857	7.24638	9.09091	11.0639	20.7207	6.78733	6.29371	4.6083	4.42804	6.58915	3.18182	3.79147	8.44444	21.7949	7.34694	7.54717	5																													7.14286	18.8406	12.7273	31.9149
MVC	2.22222	3.57142	1.88018	3.38542	1.16618	2.66667	2.32558	8.4507	4.10959																																					57.7778	60.7143	67.7116	61.1979
Figure 3D: eGFP-CCR5 clustering after PSC-RANTES treatment
Fluorescence intensity under large immobile spots and small mobile spots after PSC-RANTES stimulation.
Small	Large
534	2317
478	1861
489	3132
422	2199
465	1520
639	2647
495	2863
471	3823
533	2595
554	2086
517	2746
482	1790
Figure 3E: Effect of maraviroc (MVC) on PSC-RANTES-induced eGFP-CCR5 mobility restriction.
Percentage of restricted tracklets after successive stimulation with maraviroc (MVC) and PSC-RANTES.
min	MVC + PSC-R
0	16.9
1
2	13.1627
3	13.0102
4
5	15.4943	PSC-RANTES added
6
7	16.9722
8
9
10
11	13.8947
12	11.2889
Figure 3F: eGFP-CCR5 mobility after MVC or MVC+ PSC-RANTES treatment.
Distribution of eGFP-CCR5 tracklets motions after successive stimulation with maraviroc (MVC) and PSC-RANTES.
	Restricted															Brownian															Directed
Untreated	23.9403	22.5171	28.7356	21.875	20.5592	15.8068	14.3851	13.961	25.1786	14.931	13.7999	11.3208	15.1535	12.5793		75.6672	76.8764	70.9195	77.5735	79.2763	83.7541	85.1508	85.7143	74.4643	84.3789	85.5461	87.8931	83.8014	86.4693		0.392465	0.60652	0.344828	0.551471	0.164474	0.439078	0.464037	0.324675	0.357143	0.690088	0.654022	0.786164	1.04507	0.951374
MVC	13.0102	15.4943														86.6071	83.9646														0.382653	0.541072
MVC + PSC-R	13.8947	11.2889														85.4737	88.3555														0.631579	0.355556
[truncated: 131 more columns]
