# Supplementary material for: Tracking receptor motions at the plasma membrane reveals distinct effects of ligands on CCR5 dynamics depending on its dimerization status
Source: eLife. 2022 Jul 22;11:e76281. doi: 10.7554/eLife.76281 (PMC9307273; doi:10.7554/eLife.76281)
Supplement: Figure 4—figure supplement 1—source data 1. [file elife-76281-fig4-figsupp1-data1.xlsx]

## Sheet: Figure 4 supplement source data
Figure 4-figure Supplement source data
Figure 4-figure supplement 1: Effect of PTX treatment on chemokine-mediated chemotaxis
Cells treated with PTX were added to the upper chambers of HTS-transwell. Chemokines were to the lower chambers.
The number of cells migrating across the membrane was assessed by flow cytometry
	cells number
input	29735	24337
spont	110	96	93
SDF-1	5342	3900
SDF-1 + PTX	82	83	103
PSC-R	1502	990	1264
PSC-R + PTX	87	107	106
