# Supplementary material for: Tracking receptor motions at the plasma membrane reveals distinct effects of ligands on CCR5 dynamics depending on its dimerization status
Source: eLife. 2022 Jul 22;11:e76281. doi: 10.7554/eLife.76281 (PMC9307273; doi:10.7554/eLife.76281)
Supplement: Figure 4—source data 1. [file elife-76281-fig4-data1.xlsx]

## Sheet: Figure 4_Source data
Figure 4 source data: Effect of Gi-coupling and b-arrestin association on eGFP-CCR5 mobility
Figure 4A: Effect of PTX treatment on eGFP-CCR5 mobility in the basal state
Percentage of restricted tracklets in eGFP-CCR5 expressing cells pre-treated or not with PTX
Untreated	PTX
13.1737	11.7647
26.6078	20.5128
22.6449	19.0341
20.9767	13.342
20.4724	14.629
21.192	18.2898
27.0636	15.1356
20.2393	11.1288
14.178	20.0825
17.3077	15.7821
19.9041	21.8413
20.7254	16.1585
	17.0238
	10.3391
	17.2378
Figure 4B: Effect of PTX treatment on eGFP-CCR5 mobility after stimulation with PSC-RANTES.
Distribution of restricted tracklets over time of eGFP-CCR5 expressed on PSC-RANTES treated cells after incubation or not with PTX
min	PSC-R			PTX PSC-R
0	20.96	19.31		16.08	16.52		14.19
1	22.8777	19.6751	30.3725	23.7113	11.3395
2
3		27.907	38.5231		21.2644
4	45.7576	58.4084	23.0337	51.8934
5		54.4576	40.0355
6	48.0881		41.4006	45.2442
7		63.9485	41.7212	56.2657			54.5662
8				65.0974			43.0213
9				47.8336		30.4515	50.3167
10				36.5011			42.0168
11	49.2181				46.6848	24.9048	58.728
12					57.405		56.9746
Figure 4C: Effect of siRNA b-arrestin on eGFP-CCR5 mobility in the basal state
Proportion of restricted tracklets in eGFP-CCR5 expressing cells transfected with siRNA barr 1/2.
Ctl	-arrestin
13.9932	15.8025
15.119	15.774
14.956	9.65251
12.7341	11.2876
12.7569	11.5917
13.6788	14.7495
19.0909	14.7036
	16.0109
Figure 4D: Effect of siRNA b-arrestin on eGFP-CCR5 mobility after stimulation with PSC-RANTES
Percentage of restricted tracklets over time of eGFP-CCR5-WT expressed on PSC-RANTES treated cells after siRNA barr 1/2 transfection
min	Ctl	-arrestin
0	14.6	13.7
1	22.0132	12.2047
2	27.957	13.9381
3	42.6684
4
5
6		14.5833
7
8	58.1395	14.7416
9		23.6292
10	66.0269
11		21.5311
12		23.2365
