# Supplementary material for: Tracking receptor motions at the plasma membrane reveals distinct effects of ligands on CCR5 dynamics depending on its dimerization status
Source: eLife. 2022 Jul 22;11:e76281. doi: 10.7554/eLife.76281 (PMC9307273; doi:10.7554/eLife.76281)
Supplement: Figure 5—figure supplement 1—source data 1. [file elife-76281-fig5-figsupp1-data1.xlsx]

## Sheet: Figure 5 supplement source data
Figure 5-figure Supplement source data
Figure 5-figure supplement 1: chemokine-induced ERK activation revealed by Western blots.
CCL4-induced ERK1/2 activation in HEK 293 cells stably expressing FLAG-ST-CCR5-WT or FLAG-ST-CCR5-L196K
Band intensities on the same film were quantified by densitometry.
	CCR5-WT			CCR5-L196K
	0	8.29019	1.29074	0	0	0.026905
	1	6.48903	17.0695	1	1.37928	9.05292
	2	32.7742	22.5181	2	16.9629	36.242
	5	35.3624	61.9169	5	26.8985	39.2312
	10	100	100	10	55.0937	96.3101
	15	51.1295	0	15	24.2892	3.23502
Figure 5-figure supplement 2: Characterization of the motion of dimerization-compromised mutant FLAG-ST-CCR5-L196K
Distribution of pooled trackets motion of FLAG-ST-CCR5-WT and FLAG-ST-CCR5-L196K
	Restricted																									Brownian
WT	39.29	53.65	47.59	32.45	35.28	52.71	19.02	48.08	47.51	59.82	58.8	52.59	60.45	68.53	67.75	66.8	40.76	42.4	54.23	58.05	48.23	62.66	62.94	57.7	62.04	59.92	43.9	52.09	66.37	63.51	45.45	81.18	50.58	52.21	38.12	40.14	46.72	39	31.15	31.15	30.94	58.62	56.93	44.45	41.1	50.75	36.79	35.81	42.01
L196K	54.43	41.76	35.66	36.47	26.42	47.92	34.77	34.86	36.33	34.88	48.38	32.54	44.29	50.38	48.54											44.69	57.25	63.76	62.09	72.41	51.03	63.76	64.76	62.75	63.17	51.61	66.66	54.92	34.22	28.08
[truncated: 26 more columns]
