# Supplementary material for: Tracking receptor motions at the plasma membrane reveals distinct effects of ligands on CCR5 dynamics depending on its dimerization status
Source: eLife. 2022 Jul 22;11:e76281. doi: 10.7554/eLife.76281 (PMC9307273; doi:10.7554/eLife.76281)
Supplement: Figure 5—source data 1. [file elife-76281-fig5-data1.xlsx]

## Sheet: Figure 5_Source data
Figure 5 source data: Characterization of the dimerization-compromised mutant eGFP-CCR5-L196K
Figure 5B: Characterization of the dimerization-compromised mutant eGFP-CCR5-L196K
Quantification of the fluorescent populations at the surface of cells expressing eGFP-CCR5-WT and eGFP-CCR5-L196K and treated or not with MVC
	Monomers											Dimers											Oligomers
WT	50	32.2	36.5	52.4	52	56	49.2	52	55	65	31	39.5	48.3	49	38.5	46.6	44	40.8	46.6	41	35	53	9.5	19.5	14.5	9.1	1.4	10	0	1.4	4	0	15
L196K	84	70	70.6	66.3	80	80.5	74					16	30	29.4	31.2	20	19.5	26					0	0	0	2.5	0	0	0
WT/MVC	62.7	41	58	44								35.3	49	35	41								2	10	7	15
L196K/MVC	33.7	48.3	58									50.1	40.2	42									16.2	11.5	0
Figure 5C: motion of eGFP-CCR5-WT and eGFP-CCR5-L196K
Distribution of pooled trackets motion of eGFP-CCR5-WT and eGFP-CCR5-L196K
	Restricted												Brownian												Directed
WT	20.6767	28.3019	18.6851	17.2185	18.435	22.0373	15.87	21.524	17.0213	19.6078			78.9474	70.7547	80.7959	82.7815	81.0345	77.4967	82.696	77.8822	82.1513	79.4118			0.37594	0.943396	0.519031	0	0.530504	0.466045	1.43403	0.593765	0.980392
L196K	16.4557	13.3094	12.8851	18.4502	17.7738	10.1322	17.6833	13.5261	18.7097	12.8186	11.9713	6.54206	82.7004	85.6115	86.5546	81.1808	81.5978	89.5154	81.7571	85.7276	81.2903	86.3074	87.7419	91.5888	0.843882	1.07914	0.560224	0.369004	0.628366	0.352423	0.559597	0.746269	0	0.873999	0.286738	1.86916
Figure 5D: effect of PTX on eGFP-CCR5-L196K mobility
Percentage of restricted tracklets in eGFP-CCR5-L196K cells pre-treated or not with PTX
Untreat	11.3089	14.0374	8.2495	10.6183	12.844
PTX	13.2	10.8134	12.3028	15.6069	19.5219
Figure 5E: Impact of PSC-RANTES on eGFP-CCR5-L196K mobility over time
Percentage of restricted tracklets over time of PSC-RANTES induced eGFP-CCR5-WT or eGFP-CCR5-L196K expressing cells
min	WT PSC-R			L196K PSC-R
0	18.81	16.16	12.75	15.13	22	14.34
0.5	34.338
1					15.1536	25.649
2		44.843	22.3656
3		48.4488			13.6152	23.7636
4		50.7347	37.3973		19.6282
5				26.9446	24.0625
6		74.5763				24.2202
7	51.0582	51.8272	57.9817		27.8607
8		59.6914			13.4438
9	65.5844	47.9012		15.7529		25.1592
10
11	74.7562	54.1535		26.5031
Figure 5F: Impact of 10 min of PSC-RANTES treatment on eGFP-CCR5-L196K mobility
Distribution of tracklets motion after 10 min of PSC-RANTES stimulation
	Restricted										Brownian										directed
Untreat	13.4961	16.8096	15.0246	12.5	18.9406	16.0571	17.8264	15.6685	16.4581	11.6279	85.5399	82.7616	84.2365	86.3281	80.0963	83.0508	81.1796	83.2869	82.7284	87.7076	0.96401	0.428816	0.738916	1.17188	0.963082	0.892061	0.994036	1.04457	0.813517	0.664452
PSC-R	12.6642	27.8	20.1098	19.7163							86.4916	71.7333	79.6157	79.5745							0.844278	0.466667	0.274537	0.70922
