# Supplementary material for: Tracking receptor motions at the plasma membrane reveals distinct effects of ligands on CCR5 dynamics depending on its dimerization status
Source: eLife. 2022 Jul 22;11:e76281. doi: 10.7554/eLife.76281 (PMC9307273; doi:10.7554/eLife.76281)
Supplement: Figure 6—figure supplement 1—source data 1. [file elife-76281-fig6-figsupp1-data1.xlsx]

## Sheet: Figure 6 supplement source data
Figure 6-figure Supplement source data
Figure 6-figure supplement 1: b-arrestin 2 recruitment to CCR5 upon PSC-RANTES stimulation.
Quantification of the percentage of colocalization between barr2-GFP spots and CCR5 fluorescent spots
min	CCR5-WT									CCR5-L196K
0	0									0
5	20.3883	20.1289	18.9028	50.8824	19.8378	35.5092	57.7581	66.8208	34.929	17.5572	13.071	9.27387	27.388	22.4108	57.1219	24.2996	24.1978	18.3507	7.56264
10	30.3206	40.5177	47.3439	16.6584	29.9124	38.0145	42.1527	23.2799		13.3304	12.5281	18.04	12.1117	7.13689	19.7552	24.783	29.2423	15.2525	19.2543	28.3188	27.4215	31.2926	42.5425
15	28.386	27.6286	13.2806	26.302	38.7275	29.0994	34.6147	37.1563	17.4406	5.44315	11.5367	18.0324	4.19545	27.2679	12.5236
