# Supplementary material for: Tracking receptor motions at the plasma membrane reveals distinct effects of ligands on CCR5 dynamics depending on its dimerization status
Source: eLife. 2022 Jul 22;11:e76281. doi: 10.7554/eLife.76281 (PMC9307273; doi:10.7554/eLife.76281)
Supplement: Figure 6—source data 1. [file elife-76281-fig6-data1.xlsx]

## Sheet: Figure 6_source data
Figure 6 source data: b-arrestin 2 recruitment to CCR5 and CCR5 trafficking
Figure 6B: b-arrestin 2 recruitment to CCR5
Quantification of the barr2-GFP spots detected over time at the surface of FLAG-ST-CCR5-WT and FLAG-ST-CCR5-L196K expressing cells treated with PSC-RANTES.
min	CCR5-WT									CCR5-L196K
0	0.0039319	0	0	0.00333389	0.00347802					0.00257911	0.00845916	0.00281073
5	0.124243	0.160734	0.140288	0.247397	0.230769	0.225749	0.194363	0.180421	0.140633	0.130384	0.136215	0.185753	0.118537	0.153979	0.243956	0.162038	0.180546	0.146797	0.124069
10	0.238316	0.205213	0.30294	0.149076	0.0793614	0.21028	0.303937	0.324364		0.201235	0.187256	0.241268	0.184812	0.141882	0.177	0.172025	0.375329	0.213463	0.166563	0.134088	0.207651	0.198862	0.215382
15	0.264364	0.305358	0.298544	0.334221	0.30092	0.211181	0.286844	0.265385	0.167627	0.224991	0.325106	0.276941	0.143209	0.211745	0.180093
Figure 6C: Comparison of CCR5-WT and CCR5-L196K internalization after stimulation.
Cell surface expression of FLAG-ST-CCR5-WT or FLAG-ST-CCR5-L196K was monitored by flow cytometry in stable HEK 293 cell clones after stimulation with a saturating concentration of PSC-RANTES (% relative to untreated cells).
min	CCR5-WT		CCR5-L196K
0	100	100	100	100
5	38.3282	43.8311	55.3808	61.4527
15	26.7471	37.0199	29.5107	58.1933
30	19.0948	26.7869	27.6207	48.685
60	12.6586	16.1651	28.9467	26.0896
