# Supplementary material for: Tracking receptor motions at the plasma membrane reveals distinct effects of ligands on CCR5 dynamics depending on its dimerization status
Source: eLife. 2022 Jul 22;11:e76281. doi: 10.7554/eLife.76281 (PMC9307273; doi:10.7554/eLife.76281)
Supplement: Figure 7—figure supplement 1—source data 1. [file elife-76281-fig7-figsupp1-data1.xlsx]

## Sheet: Figure 7 supplement source data
Figure 7-figure Supplement source data
Figure 7-figure supplement 1: Effect of HIV-1 gp120 on FLAG-ST-CCR5-WT mobility
Proportion of restricted tracklets after gp #25 and gp #34 treatment (in complex with sCD4) on FLAG-ST-CCR5-WT.
Untreated	gp #25	gp #34
67	65.2	72.08
66.72	51.93	52.8
43.83	51.93	65.31
57.49	60.86	60.1
55.51	53.83	68.61
47.06	50.39	59.83
63.96	69.55	64.16
70.43	64.74	64.08
54.92	71.58	57.28
40.93	58.02	65.96
46.28	65.96	64.32
41.86	60.54	65.86
47.24	61.43	69.21
	57.27	77.55
	56.58	74.75
	57.32
	72.07
	61.26
	56.01
	64.48
	59.69
	64.01
	59.06
