# Supplementary material for: Tracking receptor motions at the plasma membrane reveals distinct effects of ligands on CCR5 dynamics depending on its dimerization status
Source: eLife. 2022 Jul 22;11:e76281. doi: 10.7554/eLife.76281 (PMC9307273; doi:10.7554/eLife.76281)
Supplement: Figure 7—source data 1. [file elife-76281-fig7-data1.xlsx]

## Sheet: Figure 7_Source data
Figure 7 source data: Effect of HIV-1 gp120 on eGFP-CCR5-WT and eGFP-CCR5-L196K mobility
Figure 7A: Effect of HIV-1 gp120 on eGFP-CCR5-WT mobility
Proportion of restricted tracklets after gp #25 and gp #34 treatment (in complex with sCD4) on eGFP-CCR5-WT.
	CCR5-WT																											CCR5-L196K
Untreated	14.0221	16.9967	12.407	18.6541	18.8382	22.0077
gp #25	11.0546	20.2276	15.562	8.80989	11.208	20.6941	19.9446	15.9722	13.346	13.4048	15.6305	13.9553	10.7635	10.2251	15.0265
gp #34	42.9535	29.2842	30.2041	16.7582	19	24.4485	27.3987	15.3192	14.1221	18.3926	18.1818	20.8577
Figure 7B: Effect of HIV-1 gp120 on eGFP-CCR5-L196K mobility
Proportion of restricted tracklets after gp #25 and gp #34 treatment (in complex with sCD4) on eGFP-CCR5-L196K.
	CCR5-L196K
Untreated	16.1	13.8996	11.319	12.7692	7.82014	13.8484	10.6329	14.9723	13.1051	13.8423	9.24956	9.36214
gp #25	13.037	11.6883	23.4043	14.0468	15.8463	16.4103	12.8114	14.2857
gp #34	42.9535	29.2842	30.2041	11.4243	22.2503	11.9745	17.1247	20.5433	11.3082	26.2566	13.9535	18.5094	19.4539
Figure 7C: Effect of HIV-1 gp120 on eGFP-CCR5 mobility
Percentage relative to untreated cells of restricted tracklets after gp #25 and gp #34 treatment (in complex with sCD4) on eGFP-CCR5-WT- and eGFP-CCR5-L196K.
	CCR5-WT	CCR5-L196K
Untreated	100	100
gp #25	82.35	125
gp #34	135.3	175
